# Supplementary material for: Binder-free graphene foams for O2 electrodes of Li–O2 batteries
Source: Royal Society of Chemistry journal article supplement (doi:10.1039/c3nr03321j), 2013-01-01
Supplement: c3nr03321j.pdf [file c3nr03321j.pdf]

## Supplementary information

**Table 1. Effects of anodic currents on graphite electrodes. The aqueous electrolyte consists of 1 M Na<sub>2</sub>SO<sub>4</sub>. Anodic currents duration is limited within one hour.**

| Current range (mA cm <sup>-2</sup> ) | Phenomena                                                                                | Schematic demonstration                                                              |
|--------------------------------------|------------------------------------------------------------------------------------------|--------------------------------------------------------------------------------------|
| 0 - 100                              | Mild expansion and no exfoliation.                                                       | 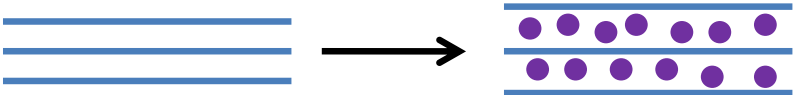   |
| 100 - 300                            | Moderate expansion and slow exfoliation. (Electrochemical leavening of graphene foams)   |   |
| > 300                                | Intense expansion and fast exfoliation. (Electrochemical exfoliation of graphene sheets) |  |

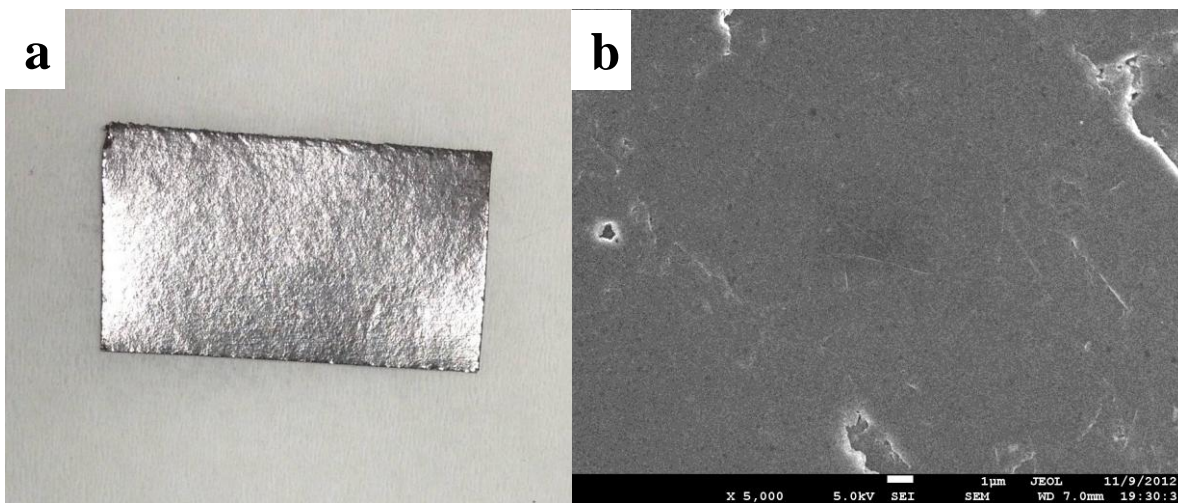

**Figure S1. (a) The optical and (b) SEM images of the pristine graphite paper.**

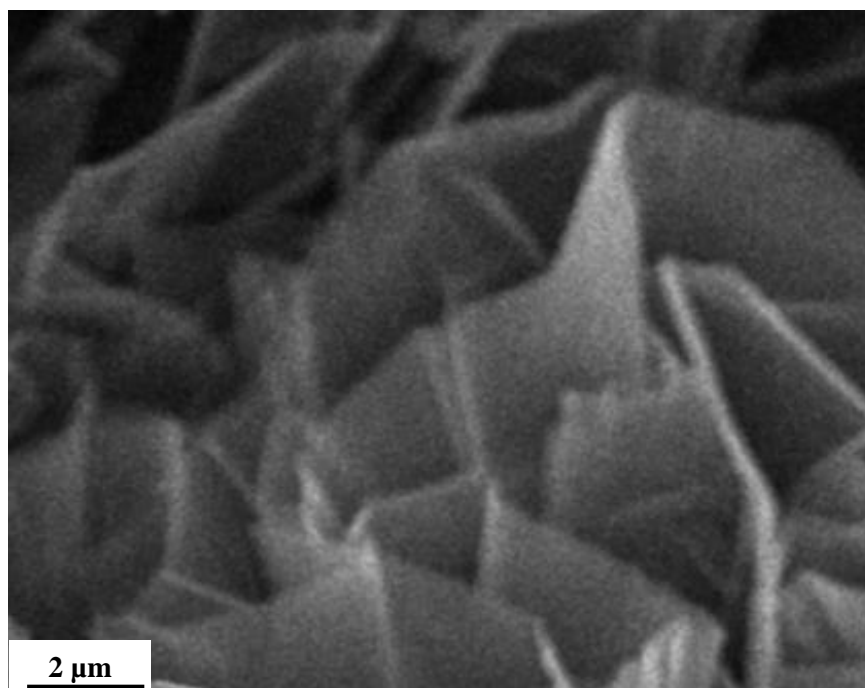

**Figure S2. The SEM image of the graphene foam after annealing in Ar.**

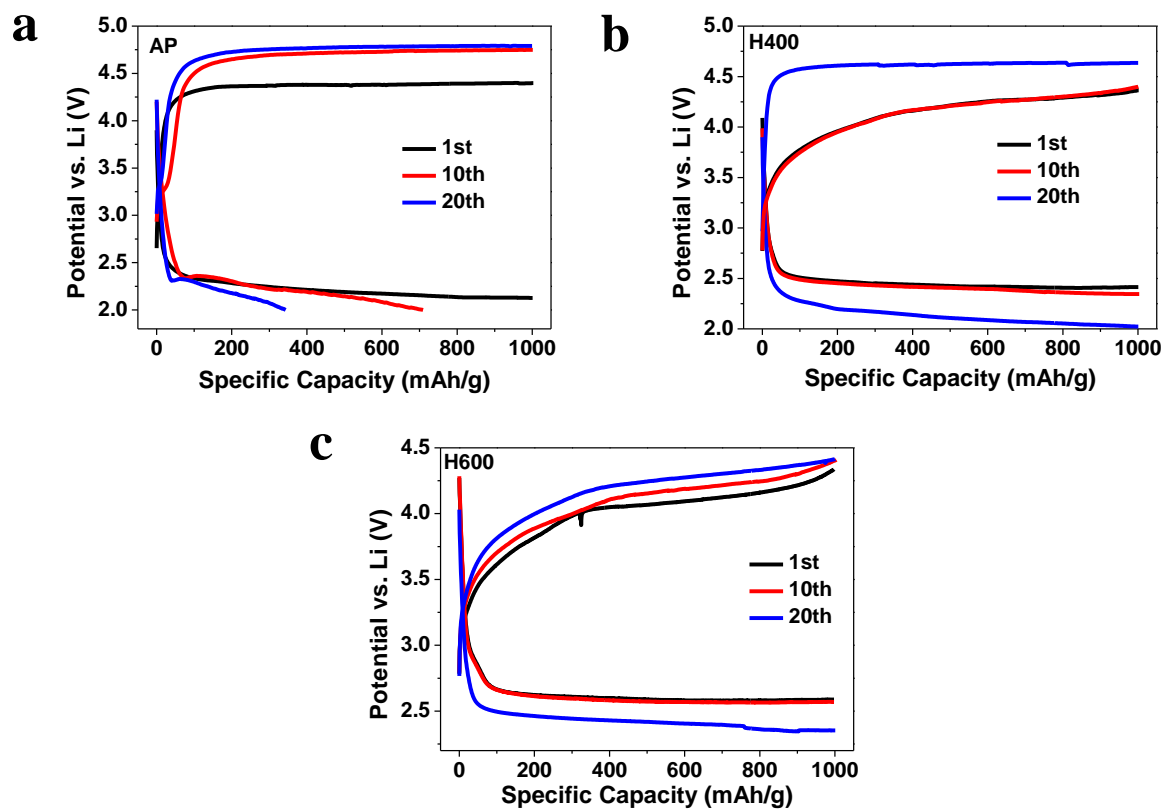

**Figure S3.** Cycling performance of the graphene foams (a) without annealing and after annealing in Ar at (b) 400 and (c) 600 °C at 100 mA/g.
